# Supplementary material for: Optimized step size control within the Rosenbrock solvers for stiff chemical ordinary differential equation systems in KPP version 2.2.3_rs4
Source: Copernicus journal article supplement (doi:10.5194/gmd-18-4273-2025), 2025-07-15
Supplement: Supplementary file 1 [file gmd-18-4273-2025-supplement.pdf]

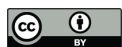

*Supplement of*

## **Optimized step size control within the Rosenbrock solvers for stiff chemical ordinary differential equation systems in KPP version 2.2.3\_rs4**

**Raphael Dreger et al.**

*Correspondence to:* Raphael Dreger (r.dreger@fz-juelich.de) and Domenico Taraborrelli (d.taraborrelli@fz-juelich.de)

The copyright of individual parts of the supplement might differ from the article licence.

## S1 Error analysis

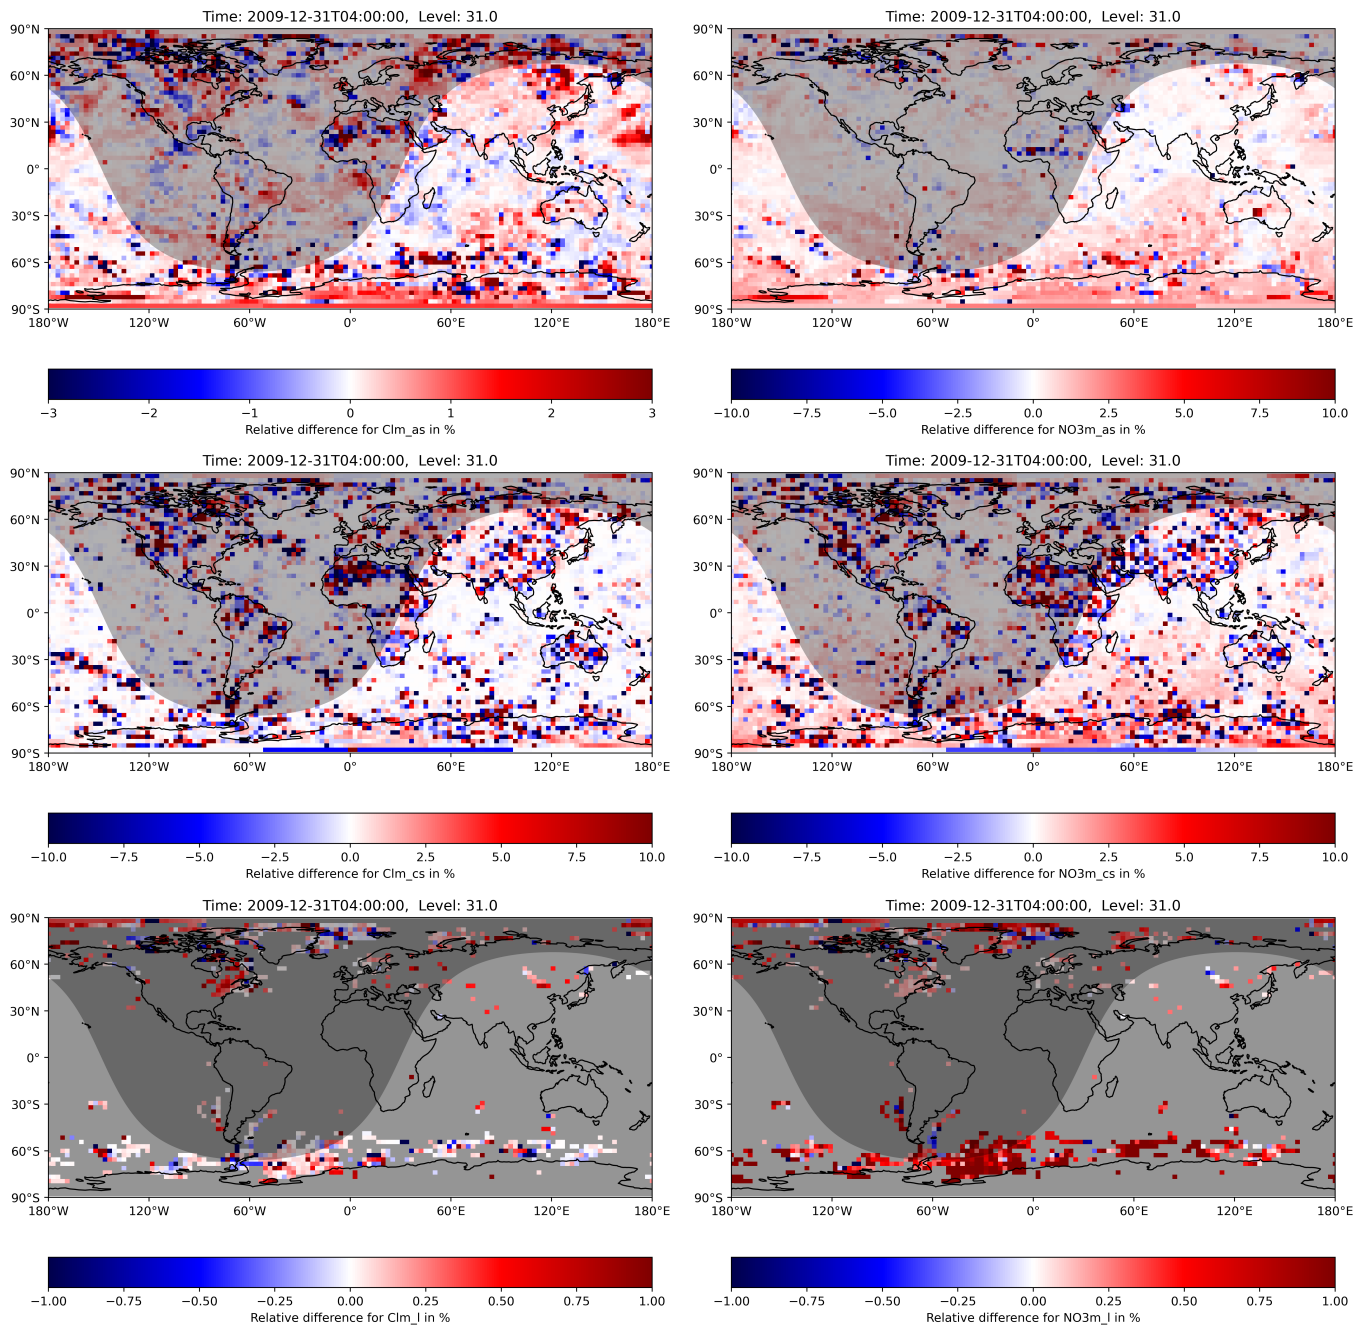

**Figure S1.** Relative differences of the mixing ratios between the H211b and the reference one-year simulation for  $\text{NO}_3^-$  and  $\text{Cl}^-$  in accumulation aerosol mode, coarse aerosol mode and cloud droplets.

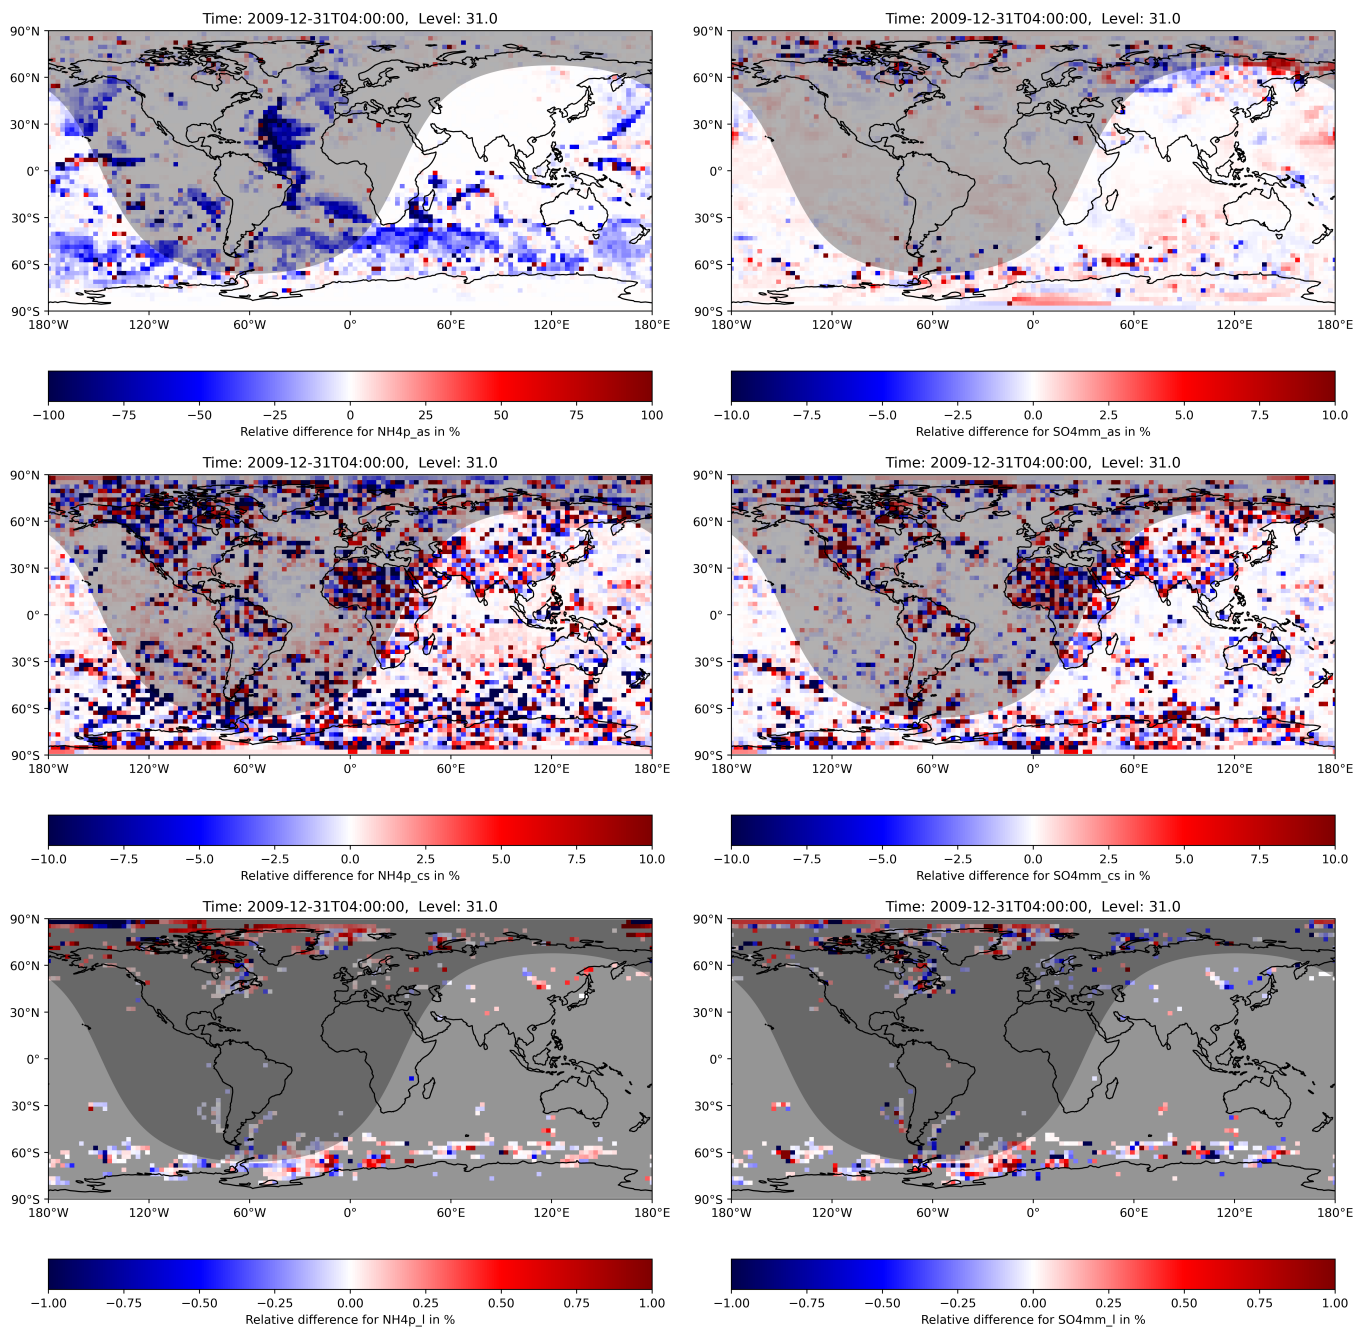

**Figure S2.** Relative differences of the mixing ratios between the H211b and the reference one-year simulation for  $\text{SO}_4^{2-}$  and  $\text{NH}_4^+$  in accumulation aerosol mode, coarse aerosol mode and cloud droplets.
